# Supplementary material for: Autologous Bone Marrow Mononuclear Cell Transplantation Therapy Improved Symptoms in Patients with Refractory Diabetic Sensorimotor Polyneuropathy via the Mechanisms of Paracrine and Immunomodulation: A Controlled Study
Source: PubMed Central journal article supplement — Cell Transplant. 2020 Aug 13;29:0963689720949258. doi: 10.1177/0963689720949258 (PMC7563922; doi:10.1177/0963689720949258), 2020-08-13
Supplement: Supplement_materials_0703.pdf [file Supplement_materials_0703.pdf]

**Supplement Table 1. The visit schedule of DSPN group**

| Time of<br>Follow-up<br>Items     | Post-transplantation |           |           |            |             |             |             |
|-----------------------------------|----------------------|-----------|-----------|------------|-------------|-------------|-------------|
|                                   | Baseline             | 2<br>days | 1<br>week | 4<br>weeks | 12<br>weeks | 24<br>weeks | 48<br>weeks |
| <b>Routine tests</b>              | √                    | √         | √         | √          | √           | √           | √           |
| <b>NCV</b>                        | √                    |           |           |            | √           |             | √           |
| <b>TCSS</b>                       | √                    |           |           | √          | √           | √           | √           |
| <b>Inflammatory<br/>cytokines</b> | √                    | √         | √         | √          | √           | √           | √           |
| <b>Growth factors</b>             | √                    | √         | √         | √          | √           | √           | √           |

NCV: nerve conduction velocity; TCSS: Toronto Clinical Scoring System; Routine tests included the test of blood pressure, heart rate, BMI, blood and urine routine examination, hepatic and renal function, and coagulation function. Inflammatory cytokines included IL-6, TNF- $\alpha$ , IL-10, and sICAM-1. Growth factors included VEGF and NGF.

**Supplement Table 2. Nerve Conduction studies before and after BM-MNCs therapy**

| Groups                | Baseline     | Post-transplantation |              |
|-----------------------|--------------|----------------------|--------------|
|                       |              | 12 weeks             | 48 weeks     |
| <b>sNCV (m/s)</b>     |              |                      |              |
| All (n=60)            | 32.91 ± 2.20 | 35.44 ± 2.80         | 33.82 ± 2.49 |
| <i>p value</i>        | --           | 0.000                | 0.000        |
| Responders (n=35)     | 32.87 ± 2.31 | 36.81 ± 2.50         | 34.26 ± 2.83 |
| <i>p value</i>        | --           | 0.000                | 0.000        |
| Non-responders (n=19) | 32.95 ± 2.08 | 33.40 ± 2.11         | 33.03 ± 1.45 |
| <i>p value</i>        | --           | 0.295                | 0.843        |
| <b>SNAP</b>           |              |                      |              |
| All (n=60)            | 4.34 ± 0.49  | 5.23 ± 0.60          | 4.78 ± 0.89  |
| <i>p value</i>        | --           | 0.000                | 0.003        |
| Responders (n=35)     | 4.33 ± 0.48  | 5.41 ± 0.45          | 5.09 ± 0.87  |
| <i>p value</i>        | --           | 0.000                | 0.000        |
| Non-responders (n=19) | 4.31 ± 0.44  | 4.78 ± 0.64          | 4.20 ± 0.59  |
| <i>p value</i>        | --           | 0.029                | 0.523        |
| <b>mNCV (m/s)</b>     |              |                      |              |
| All (n=60)            | 33.63 ± 2.10 | 35.23 ± 3.02         | 34.19 ± 2.61 |
| <i>p value</i>        | --           | 0.000                | 0.005        |
| Responders (n=35)     | 33.83 ± 2.20 | 36.07 ± 2.82         | 34.76 ± 2.64 |
| <i>p value</i>        | --           | 0.000                | 0.000        |
| Non-responders (n=19) | 33.26 ± 1.90 | 33.66 ± 2.78         | 33.16 ± 2.27 |
| <i>p value</i>        | --           | 0.346                | 0.778        |
| <b>CMAP</b>           |              |                      |              |
| All (n=60)            | 3.93 ± 0.50  | 5.42 ± 0.74          | 5.05 ± 0.88  |
| <i>p value</i>        | --           | 0.000                | 0.000        |
| Responders (n=35)     | 3.99 ± 0.53  | 5.62 ± 0.76          | 5.38 ± 0.83  |
| <i>p value</i>        | --           | 0.000                | 0.000        |
| Non-responders (n=19) | 3.86 ± 0.51  | 4.91 ± 0.50          | 4.43 ± 0.60  |
| <i>p value</i>        | --           | 0.000                | 0.006        |

Data presented as mean ± standard deviation. P value: statistical difference between groups of baseline and each follow-up visit after transplantation; -: not applicable; CMAP: compound muscle action potential; mNCV: motor nerve conduction velocity; SNAP: sensory nerve action potential; sNCV: sensory nerve conduction velocity.

**Supplement Table 3. TCSS before and after BM-MNCs therapy**

| Groups                | Baseline     | Post-transplantation |             |             |             |
|-----------------------|--------------|----------------------|-------------|-------------|-------------|
|                       |              | 4 weeks              | 12 weeks    | 24 weeks    | 48 weeks    |
| All (n=60)            | 10.13 ± 1.11 | 7.52 ± 1.19          | 6.95 ± 1.20 | 7.60 ± 0.95 | 8.13 ± 0.97 |
| <i>p value</i>        | --           | 0.000                | 0.000       | 0.000       | 0.000       |
| Responders (n=35)     | 9.97 ± 1.25  | 7.40 ± 1.22          | 6.77 ± 1.06 | 7.43 ± 0.92 | 8.00 ± 0.97 |
| <i>p value</i>        | --           | 0.000                | 0.000       | 0.000       | 0.000       |
| Non-responders (n=19) | 10.16 ± 0.77 | 7.42 ± 1.12          | 7.26 ± 1.37 | 7.79 ± 0.92 | 8.37 ± 0.96 |
| <i>p value</i>        | --           | 0.000                | 0.000       | 0.000       | 0.000       |

Data presented as mean ± standard deviation. P value: statistical difference between groups of baseline and each follow-up visit after transplantation; -: not applicable; TCSS: Toronto Clinical Scoring System

**Supplement Table 4. The change of neuropathic symptoms before and after BM-MNCs therapy**

| Neuropathic symptoms | Baseline<br>n=60 | Post-transplantation |                  |                  |                  |
|----------------------|------------------|----------------------|------------------|------------------|------------------|
|                      |                  | 4 weeks<br>n=60      | 12 weeks<br>n=60 | 24 weeks<br>n=58 | 48 weeks<br>n=54 |
| <b>Foot pain</b>     | 60 (100.0%)      | 27 (45.0%)           | 28 (46.7%)       | 36 (62.1%)       | 40 (74.1%)       |
| <i>p value</i>       | --               | 0.000                | 0.000            | 0.000            | 0.000            |
| <b>Numbness</b>      | 58 (96.7%)       | 41 (68.3%)           | 39 (65.0%)       | 39 (67.2%)       | 38 (70.4%)       |
| <i>p value</i>       | --               | 0.000                | 0.000            | 0.000            | 0.000            |
| <b>Tingling</b>      | 56 (93.3%)       | 48 (80.0%)           | 46 (76.7%)       | 49 (84.4%)       | 48 (88.9%)       |
| <i>p value</i>       | --               | 0.058                | 0.019            | 0.150            | 0.514            |
| <b>Weakness</b>      | 58 (96.7%)       | 20 (33.3%)           | 12 (20.0%)       | 19 (32.8%)       | 33 (61.1%)       |
| <i>p value</i>       | --               | 0.000                | 0.000            | 0.000            | 0.000            |
| <b>Ataxia</b>        | 10 (16.7%)       | 8 (13.3%)            | 6 (10.0%)        | 6 (10.3%)        | 7 (13.0%)        |
| <i>p value</i>       | --               | 0.799                | 0.421            | 0.422            | 0.610            |

Data presented as n (%). P value: statistical difference between baseline and each follow-up visit after transplantation; -: not applicable.
